# Supplementary material
Source: publisher figshare collection journal article supplement (https://rs.figshare.com/ndownloader/files/22303908)
Supplement: Supplementary file [file 22303908]

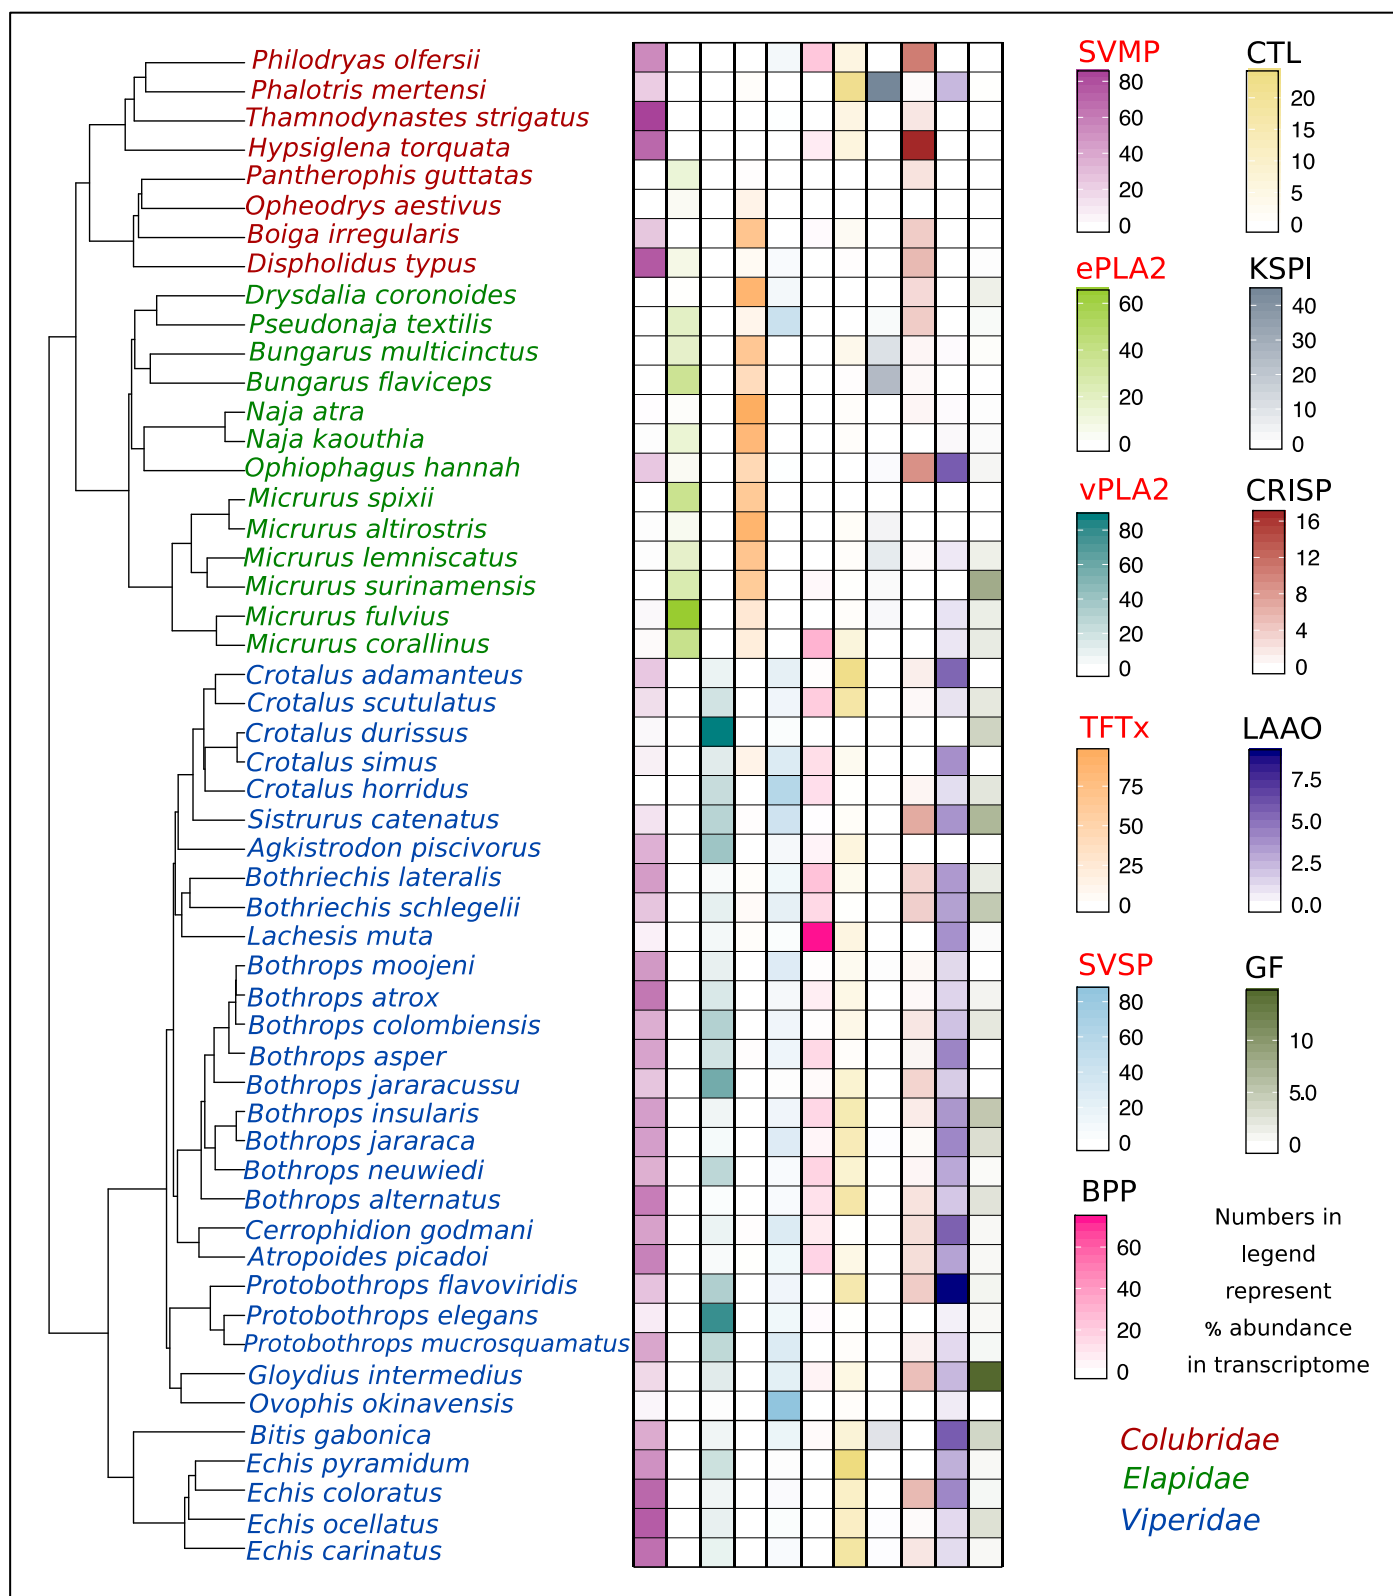

**Fig. 1: Phylogeny (51) and relative abundance of 10 toxin families from venom transcriptome of 52 species of venomous snake. Snakes use different levels of each toxin family in their venom with a clear preference between families. The toxin names in red denote the most abundant and widespread toxin families in venomous snakes. Except for the PLA2s, which have distinct lineages in colubrid and elapid vs. viperid snakes, all toxins seem to present at some level each of the three families of venomous snakes. SVMP: Snake Venom Metalloprotease, SVSP: Snake Venom Serine Protease, ePLA2: Phospholipase A2 (I), vPLA2: Phospholipase A2 (II), TFTx: Three Finger Toxin, CRISP: Cysteine-Rich Secretory Protein, CTL: C-type Lectin, LAAO: L-amino acid oxidase, KSPI: Kunitz-type serine protease inhibitors, BPP: Bradykinin-potentiating peptide, GF: Growth factors.**
